# Supplementary material for: Corticosterone-Mediated Physiological Stress Alters Liver, Kidney, and Breast Muscle Metabolomic Profiles in Chickens
Source: MDPI journal article supplement (doi:10.3390/ani11113056), 2021-10-26
Supplement: s1 [file s1]

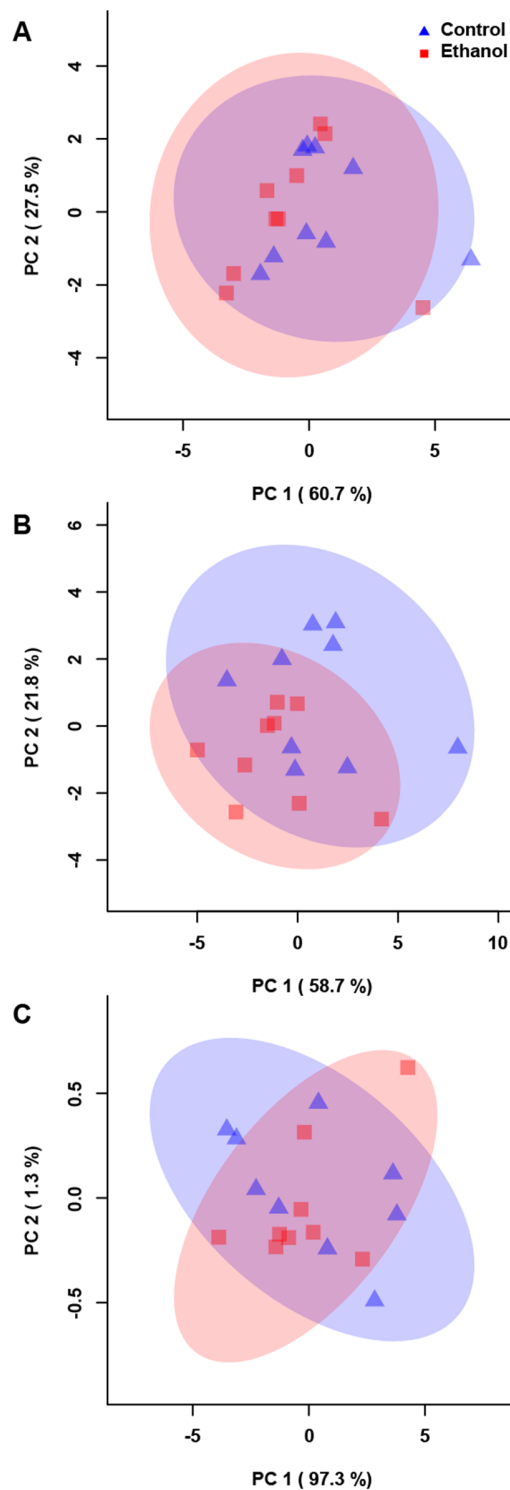

**Figure S1.** Principal component analysis scores plots for the control treatment vs the ethanol treatment. (A) Kidney. (B) Liver. (C) Breast muscle. Each triangle or square represents one chicken (n=9), plotted using a list of bins found to be statistically significant via paired T-test and/or multivariate variable importance analysis based on random variable combination analysis. The X and Y axes show principal components with brackets indicating percent variance and the shaded ellipse representing the 95% confidence interval.

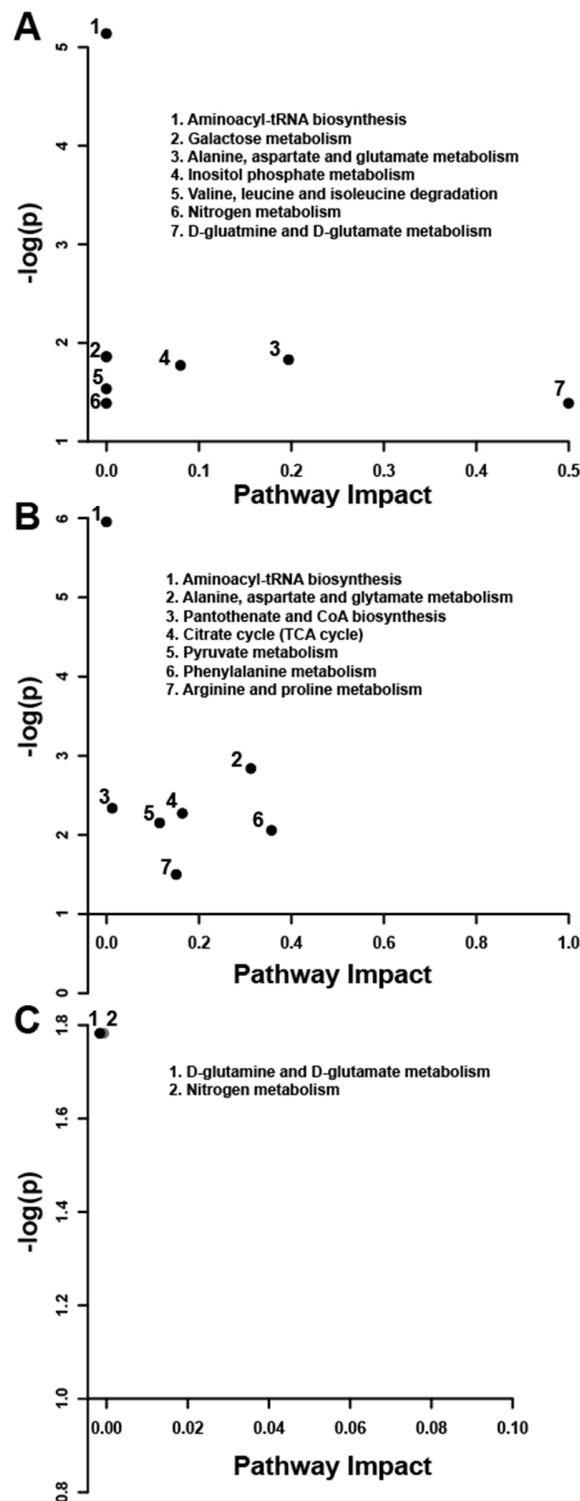

**Figure S2.** Metabolomic pathway analysis showing all matched pathways according to p-values from pathway enrichment analysis and pathway impact values for the control treatment vs the ethanol treatment. (A) Kidney. (B) Liver. (C) Breast muscle. A larger value on the y-axis indicates a lower  $P$ -value. The x-axis gives the pathway impact. Only metabolic pathways with  $P \leq 0.050$  are labeled. This figure was created using the lists of metabolites identified as significant by paired T-test and/or multivariate variable importance analysis based on random variable combination analysis.

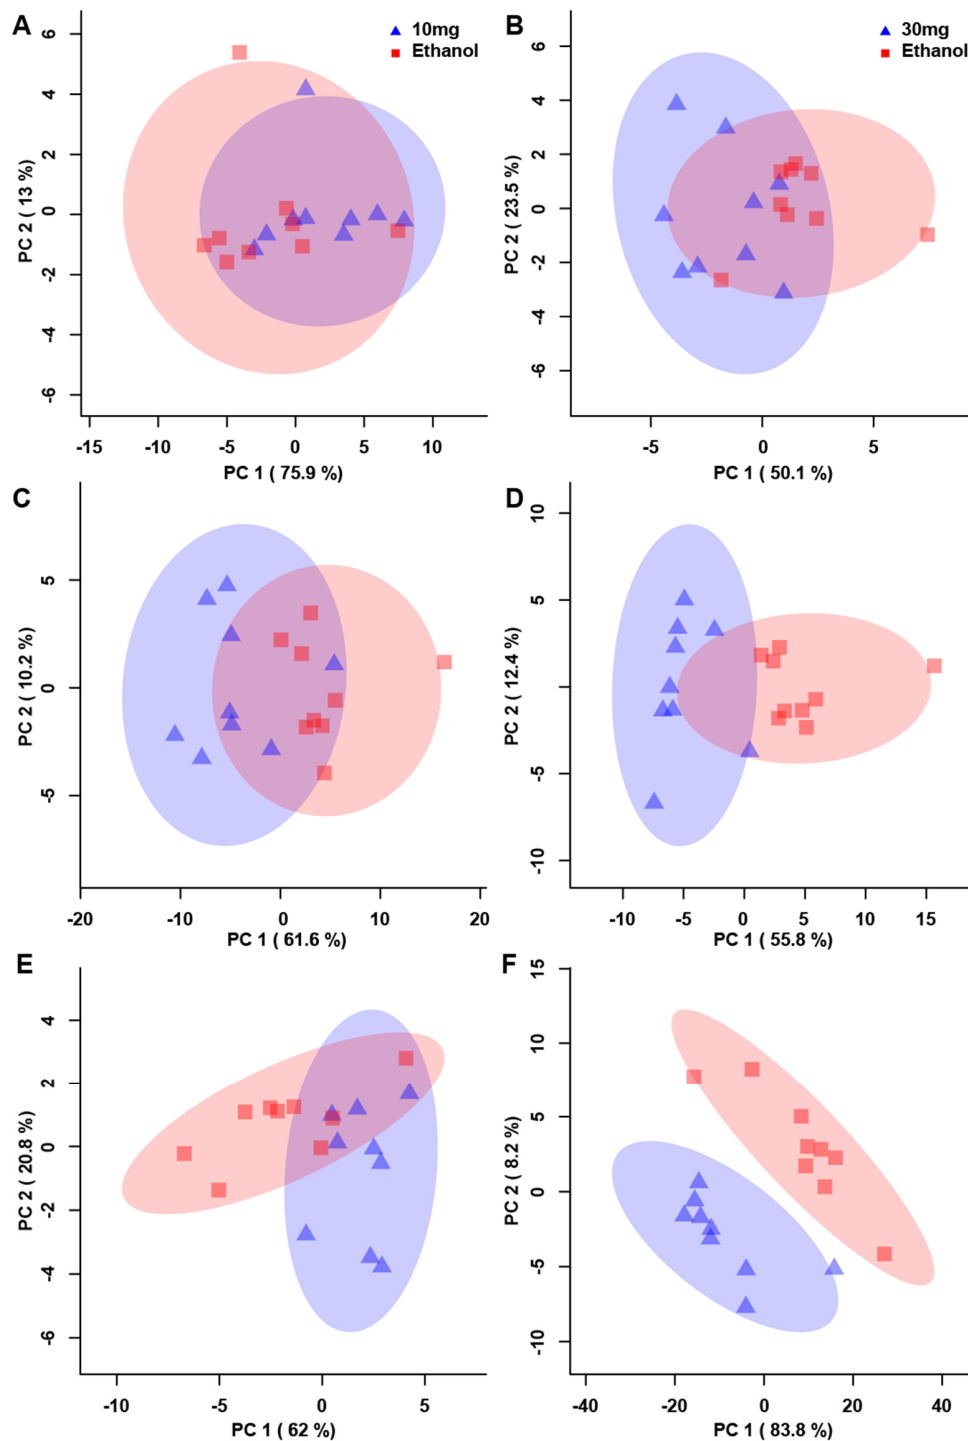

**Figure S3.** Principal component analysis scores plots for the corticosterone treatments vs the ethanol control treatment. (A) Kidney – 10 mg L<sup>-1</sup> corticosterone. (B) Kidney – 30 mg L<sup>-1</sup> corticosterone. (C) Liver – 10 mg L<sup>-1</sup> corticosterone. (D) Liver – 30 mg L<sup>-1</sup> corticosterone. (E) Breast muscle – 10 mg L<sup>-1</sup> corticosterone. (F) Breast muscle – 30 mg L<sup>-1</sup> corticosterone. Each triangle or square represents one chicken under study (n=9), plotted using a list of bins found to be statistically significant via paired T-test and/or multivariate variable importance analysis based on random variable combination analysis. The X and Y axes show principal components with brackets indicating percent variance and the shaded ellipse representing the 95% confidence interval.

**Table S1.** Number of significantly altered bins across all tissues and corticosterone (**CORT**) doses.

| <b>Kidney</b>              | <b>Paired T-test</b> | <b>VIAVC</b> | <b>Common to both tests</b> |
|----------------------------|----------------------|--------------|-----------------------------|
| 10 mg L <sup>-1</sup> CORT | 63                   | 12           | 4                           |
| 30 mg L <sup>-1</sup> CORT | 45                   | 7            | 1                           |
| <b>Liver</b>               |                      |              |                             |
| 10 mg L <sup>-1</sup> CORT | 236                  | 5            | 3                           |
| 30 mg L <sup>-1</sup> CORT | 217                  | 3            | 3                           |
| <b>Breast</b>              |                      |              |                             |
| 10 mg L <sup>-1</sup> CORT | 31                   | 10           | 1                           |
| 30 mg L <sup>-1</sup> CORT | 251                  | 75           | 72                          |

**Table S2.** *P*-values of metabolites found to be significant altered in kidneys of birds administered 10 mg L<sup>-1</sup> corticosterone (**CORT**) and 30 mg L<sup>-1</sup> CORT as compared to ethanol alone as determined by a paired T-test and/or the variable importance analysis based on random variable combination analysis. Metabolite regulation is shown as a percentage of the difference between the CORT treatment vs ethanol treatment. Metabolites for which more than one nuclear magnetic resonance peak was identified as significant are represented as metabolite 1, metabolite 2, ... metabolite n.

| Treatment                  | Metabolite                                     | Chemical shift (ppm) | T-test <i>P</i> -value | VIAVC <i>P</i> -value | Regulation |
|----------------------------|------------------------------------------------|----------------------|------------------------|-----------------------|------------|
| 10 mg L <sup>-1</sup> CORT | S-Adenosylhomocysteine 1                       | 4.45                 | 0.0019                 |                       | 13.90      |
|                            | Fumaric Acid                                   | 6.53                 | 0.002                  | 4.450E-60             | 23.13      |
|                            | Nicotinate/Nicotinic acid                      | 8.27                 | 0.0039                 |                       | 28.74      |
|                            | Phenylalanine 1                                | 3.11                 | 0.0057                 |                       | 10.30      |
|                            | sn-Glycero-3-phosphocholine 1                  | 3.88                 | 0.0073                 |                       | 12.84      |
|                            | Proline 1                                      | 3.36                 | 0.0078                 |                       | 16.50      |
|                            | Lactate 1                                      | 1.32                 | 0.0078                 |                       | -31.41     |
|                            | Malate 1                                       | 4.30                 | 0.0115                 |                       | 11.85      |
|                            | Glutamate 1                                    | 2.15                 | 0.0117                 |                       | -15.04     |
|                            | Glutamate 2                                    | 2.11                 | 0.0117                 |                       | -7.59      |
|                            | Lactate 2                                      | 1.35                 | 0.0117                 |                       | -23.43     |
|                            | Malate 2                                       | 4.30                 | 0.0129                 |                       | 21.82      |
|                            | N-Acetylaspartate 1                            | 4.38                 | 0.0137                 |                       | 20.79      |
|                            | UNIDENTIFIED 1                                 | 3.87                 | 0.015                  |                       | 11.11      |
|                            | AMP 1                                          | 6.15                 | 0.0178                 |                       | 38.70      |
|                            | 3-Methyladenine 1 and S-Adenosylhomocysteine 2 | 8.28                 | 0.0193                 |                       | 22.84      |
|                            | UDP-N-Acetylglucosamine                        | 6.00                 | 0.0195                 |                       | 19.19      |
|                            | Lactate 3                                      | 4.13                 | 0.0195                 |                       | -20.31     |
|                            | Lactate 4                                      | 4.12                 | 0.0195                 |                       | -18.84     |
|                            | Glutamate 3                                    | 2.12                 | 0.0195                 |                       | -9.05      |
|                            | Isoleucine 1                                   | 0.96                 | 0.0195                 |                       | -10.19     |
|                            | Isoleucine 2                                   | 0.95                 | 0.0195                 |                       | -11.45     |
|                            | sn-Glycero-3-phosphocholine 2                  | 3.70                 | 0.0213                 |                       | 16.11      |
|                            | Inosine 1                                      | 8.37                 | 0.022                  | 2.055E-07             | 45.32      |
|                            | N6-Acetyl-L-lysine                             | 3.20                 | 0.0228                 |                       | 15.06      |
|                            | N-Acetylaspartate 2                            | 4.39                 | 0.0248                 |                       | 14.45      |
|                            | O-Phosphocholine                               | 3.59                 | 0.0254                 |                       | 7.67       |
|                            | 1,3-Dimethyluric Acid                          | 3.45                 | 0.0254                 |                       | 16.00      |
|                            | Citicoline 1                                   | 4.29                 | 0.0255                 |                       | 20.24      |
|                            | Glucose 1                                      | 3.84                 | 0.0269                 |                       | 18.88      |
|                            | Choline 1                                      | 4.07                 | 0.0273                 |                       | 13.16      |
|                            | 4-Hydroxyproline 1                             | 3.48                 | 0.0281                 |                       | 13.43      |
|                            | Xylulose                                       | 4.37                 | 0.0282                 |                       | 21.54      |
|                            | AMP 2 and Carnosine 1                          | 4.50                 | 0.0287                 |                       | 26.57      |

|                               |                                          |      |        |           |        |
|-------------------------------|------------------------------------------|------|--------|-----------|--------|
|                               | S-Adenosylhomocysteine 3                 | 2.99 | 0.0305 |           | 8.48   |
|                               | Glutamate 4                              | 2.06 | 0.0309 |           | -6.13  |
|                               | AMP 3 and Carnosine 2                    | 4.51 | 0.0311 |           | 29.46  |
|                               | S-Adenosylhomocysteine 4                 | 8.38 | 0.0314 |           | 41.10  |
|                               | UMP and Citicoline 2                     | 4.42 | 0.0322 |           | 20.47  |
|                               | Proline 2 and<br>1,5-Anhydrosorbitol 1   | 3.36 | 0.0323 |           | 11.98  |
|                               | UNIDENTIFIED 2                           | 4.24 | 0.0325 |           | 9.62   |
|                               | Uridine 1                                | 4.22 | 0.034  |           | 13.19  |
|                               | sn-Glycero-3-phosphocholine 3            | 3.69 | 0.0347 |           | 14.16  |
|                               | sn-Glycero-3-phosphocholine 4            | 3.89 | 0.0348 |           | 13.36  |
|                               | (R)-3-Hydroxybutyric acid                | 1.21 | 0.0351 |           | 16.83  |
|                               | AMP 4                                    | 8.60 | 0.0354 | 1.494E-16 | 31.76  |
|                               | Glutamate 5                              | 2.13 | 0.0354 |           | -10.01 |
|                               | Uridine 2                                | 4.23 | 0.0362 |           | 19.41  |
|                               | Agmatine and Carnosine 3                 | 3.07 | 0.039  |           | 7.09   |
|                               | Glutamate 6                              | 2.34 | 0.0391 |           | -11.71 |
|                               | Glutamate 7                              | 2.07 | 0.0391 |           | -8.36  |
|                               | Proline 3 and Glucose 2                  | 3.39 | 0.0394 |           | 14.34  |
|                               | Choline 2                                | 4.06 | 0.0401 |           | 18.50  |
|                               | Citicoline 3                             | 4.28 | 0.0408 |           | 18.04  |
|                               | Citicoline 4                             | 4.33 | 0.0411 |           | 14.94  |
|                               | 3-Mercaptopyruvic acid                   | 2.87 | 0.0413 |           | 21.55  |
|                               | 3-Methyladenine 2                        | 3.98 | 0.0424 |           | 9.33   |
|                               | 1,5-Anhydrosorbitol 2                    | 3.44 | 0.0438 |           | 8.65   |
|                               | Inosine 2                                | 6.10 | 0.0443 | 7.267E-09 | 45.66  |
|                               | Phenylalanine 2                          | 3.12 | 0.0457 |           | 4.85   |
|                               | Inosinic Acid                            | 8.57 | 0.047  |           | 44.15  |
|                               | Pyruvate                                 | 2.39 | 0.047  |           | 10.26  |
|                               | N-Acetylaspartate 3 and Citicoline 5     | 4.41 | 0.0492 |           | 27.92  |
|                               | Malate 3                                 | 2.66 | 0.0514 | 7.272E-47 | 12.97  |
|                               | Inosine 3                                | 6.11 | 0.0568 | 1.078E-19 | 51.44  |
|                               | Malate 4                                 | 2.38 | 0.0615 | 1.668E-44 | 6.35   |
|                               | UNIDENTIFIED 3                           | 7.57 | 0.2198 | 1.749E-04 | 31.36  |
|                               | N-Methylhydantoin                        | 2.93 | 0.3445 | 6.001E-34 | 10.16  |
|                               | Aspartate                                | 2.81 | 0.4076 | 1.320E-23 | 4.55   |
|                               | 4-Hydroxyproline 2 and Isovalerylglycine | 2.17 | 0.5372 | 1.172E-42 | 2.20   |
|                               | Carnitine                                | 2.45 | 0.6014 | 5.047E-38 | -3.14  |
| 30 mg L <sup>-1</sup><br>CORT | Acetic acid                              | 1.93 | 0.0004 |           | -23.13 |
|                               | 4-Hydroxyproline 1                       | 3.48 | 0.0009 |           | 39.50  |
|                               | UNIDENTIFIED 1                           | 1.78 | 0.0018 |           | -18.88 |
|                               | Glutamate 1                              | 2.13 | 0.0033 |           | -20.46 |

|  |                                                |      |        |           |        |
|--|------------------------------------------------|------|--------|-----------|--------|
|  | 1,5-Anhydrosorbitol                            | 3.44 | 0.0036 |           | 33.31  |
|  | Fumaric Acid                                   | 6.53 | 0.0036 |           | 29.42  |
|  | Glucose-6-phosphate                            | 3.99 | 0.0039 |           | -19.09 |
|  | Glutamate 2                                    | 2.15 | 0.0039 |           | -32.83 |
|  | Glucose 1                                      | 3.84 | 0.0052 |           | 34.01  |
|  | L-Lysine                                       | 3.75 | 0.0053 |           | 15.20  |
|  | UNIDENTIFIED 2                                 | 4.00 | 0.007  |           | -20.85 |
|  | Choline 1                                      | 3.53 | 0.0078 |           | 17.54  |
|  | Glutamate 3                                    | 2.33 | 0.0116 |           | -14.21 |
|  | Glutamate 4                                    | 2.12 | 0.0117 |           | -17.53 |
|  | UNIDENTIFIED 3                                 | 3.98 | 0.0117 |           | -14.13 |
|  | UNIDENTIFIED 4                                 | 0.97 | 0.0117 |           | -18.44 |
|  | Glutamate 5                                    | 2.06 | 0.0118 |           | -13.58 |
|  | Choline 2                                      | 3.52 | 0.0195 |           | 29.51  |
|  | Glutamate 6                                    | 2.11 | 0.0195 |           | -13.66 |
|  | Phosphorylcholine 1                            | 4.17 | 0.0207 |           | -19.51 |
|  | Glucose 2                                      | 3.71 | 0.0229 |           | 24.33  |
|  | UNIDENTIFIED 5                                 | 3.27 | 0.023  |           | -35.03 |
|  | Serine                                         | 4.01 | 0.0246 |           | -15.08 |
|  | UNIDENTIFIED 6                                 | 2.71 | 0.026  |           | -15.43 |
|  | Isoleucine 1                                   | 0.95 | 0.0273 |           | -25.52 |
|  | Malate                                         | 4.31 | 0.0273 |           | 12.99  |
|  | Dimethylamine and Sarcosine                    | 2.74 | 0.0291 |           | -10.96 |
|  | Beta-Alanine                                   | 3.18 | 0.0308 |           | -12.60 |
|  | Glutamate 7                                    | 2.05 | 0.032  |           | -17.57 |
|  | sn-Glycero-3-phosphocholine 2 and Isoleucine 2 | 3.69 | 0.0339 |           | 7.90   |
|  | Argininosuccinic acid                          | 1.92 | 0.0391 |           | -7.81  |
|  | Glycerol 1                                     | 3.67 | 0.0391 |           | 9.35   |
|  | Glycine                                        | 3.57 | 0.0391 |           | -25.30 |
|  | Isoleucine 3                                   | 0.94 | 0.0391 |           | -16.92 |
|  | Pyroglutamic Acid 1                            | 2.42 | 0.0391 | 4.908E-15 | -24.88 |
|  | sn-Glycero-3-phosphocholine 1                  | 3.69 | 0.0391 |           | 20.40  |
|  | Glucose 3                                      | 3.49 | 0.0412 |           | 22.87  |
|  | Creatine                                       | 3.94 | 0.0422 |           | -11.89 |
|  | D-Glucuronic acid                              | 3.75 | 0.0423 |           | 18.74  |
|  | Malate                                         | 4.30 | 0.0443 |           | 15.87  |
|  | Creatinine and Creatine Phosphate              | 3.04 | 0.0445 |           | -23.67 |
|  | Phosphorylcholine 2                            | 3.60 | 0.0471 |           | -10.37 |
|  | Glycerol 2                                     | 3.65 | 0.0491 |           | 8.66   |
|  | Choline 3                                      | 4.07 | 0.0663 | 2.548E-09 | 21.64  |
|  | Myoinositol                                    | 3.28 | 0.0813 | 1.064E-21 | -19.12 |
|  | UNIDENTIFIED 7                                 | 4.20 | 0.7344 | 4.809E-10 | 0.31   |

|  |                                                |      |        |           |       |
|--|------------------------------------------------|------|--------|-----------|-------|
|  | N-Methylhydantoin                              | 2.93 | 0.748  | 1.860E-17 | 10.99 |
|  | Pyroglutamic Acid 2 and 3-<br>Phenylpropionate | 2.49 | 0.8203 | 2.616E-21 | -2.85 |
|  | UNIDENTIFIED 8                                 | 2.43 | 0.8867 | 4.816E-13 | -1.03 |
|  | 4-Hydroxyproline 2 and Isovalerylglycine       | 2.17 | 0.9102 | 1.221E-11 | -5.71 |



**Table S3.** *P*-values of metabolites found to be significant altered in livers of birds administered 10 mg L<sup>-1</sup> corticosterone (**CORT**) and 30 mg L<sup>-1</sup> CORT as compared to ethanol alone as determined by a paired T-test and/or the variable importance analysis based on random variable combination analysis. Metabolite regulation is shown as a percentage of the difference between the CORT treatment vs ethanol treatment. Metabolites for which more than one nuclear magnetic resonance peak was identified as significant are represented as metabolite 1, metabolite 2, ... metabolite n.

| Treatment                  | Metabolite                  | Chemical shift (ppm) | T-test <i>P</i> -value | VIAVC <i>P</i> -value | Regulation |
|----------------------------|-----------------------------|----------------------|------------------------|-----------------------|------------|
| 10 mg L <sup>-1</sup> CORT | UNIDENTIFIED 1              | 8.02                 | 0.0004                 |                       | -36.78     |
|                            | UNIDENTIFIED 2              | 3.17                 | 0.0005                 |                       | -24.67     |
|                            | Mannose                     | 5.20                 | 0.0011                 |                       | 46.89      |
|                            | 4-Hydroxyproline 1          | 3.37                 | 0.0019                 | 0.00166               | -19.53     |
|                            | Inosine 1                   | 4.45                 | 0.002                  |                       | -24.91     |
|                            | Tryptophan 1                | 7.55                 | 0.0021                 |                       | -36.39     |
|                            | Coenzyme A                  | 0.76                 | 0.0028                 |                       | -27.10     |
|                            | UNIDENTIFIED 3              | 4.46                 | 0.003                  |                       | -27.16     |
|                            | UMP 1                       | 4.42                 | 0.0031                 |                       | -26.20     |
|                            | Phenylalanine 1             | 7.35                 | 0.0033                 |                       | -37.46     |
|                            | Quinone                     | 6.81                 | 0.0036                 |                       | -41.61     |
|                            | Tyrosine 1                  | 6.92                 | 0.0037                 |                       | -43.42     |
|                            | UNIDENTIFIED 4              | 4.41                 | 0.0037                 |                       | -25.20     |
|                            | Inosine 2                   | 4.45                 | 0.0038                 |                       | -20.24     |
|                            | UNIDENTIFIED 5              | 0.87                 | 0.0038                 |                       | -32.91     |
|                            | (R)-3-Hydroxybutyric Acid 1 | 1.22                 | 0.0039                 |                       | -45.42     |
|                            | Glycerophosphocholine 1     | 3.69                 | 0.0039                 |                       | 28.82      |
|                            | N-Carbamoylaspartate 1      | 2.47                 | 0.0039                 |                       | -35.46     |
|                            | N-Methylhydantoin           | 4.10                 | 0.0039                 |                       | -22.30     |
|                            | UNIDENTIFIED 6              | 2.48                 | 0.0039                 |                       | -32.42     |
|                            | UNIDENTIFIED 7              | 2.32                 | 0.0039                 |                       | -27.16     |
|                            | UNIDENTIFIED 8              | 1.19                 | 0.0039                 |                       | -26.02     |
|                            | Valine 1                    | 2.30                 | 0.0039                 |                       | -33.74     |
|                            | L-Threonine 1               | 4.28                 | 0.0046                 |                       | -23.04     |
|                            | Tryptophan 2                | 7.21                 | 0.0046                 |                       | -34.30     |
|                            | Myoinositol 1               | 3.63                 | 0.0047                 |                       | -31.65     |
|                            | Phenylalanine 2             | 7.33                 | 0.0049                 |                       | -35.37     |
|                            | Valine 2                    | 2.29                 | 0.0051                 |                       | -27.60     |
|                            | O-Phosphocholine 1          | 3.59                 | 0.0054                 |                       | 17.05      |
|                            | Phenylalanine 3             | 7.45                 | 0.0055                 |                       | -31.08     |
|                            | Tyrosine 2                  | 7.19                 | 0.0055                 |                       | -36.15     |
|                            | Tryptophan 3                | 7.75                 | 0.0057                 |                       | -29.20     |
|                            | Myoinositol 2               | 4.08                 | 0.0062                 |                       | -37.47     |
|                            | Gamma-Glutamylcysteine 1    | 2.19                 | 0.0063                 |                       | -16.40     |
|                            | Tyrosine 3                  | 7.20                 | 0.0065                 |                       | -37.41     |

|                             |      |        |  |        |
|-----------------------------|------|--------|--|--------|
| UNIDENTIFIED 9              | 3.00 | 0.0065 |  | -16.43 |
| Uridine 1                   | 7.88 | 0.0071 |  | -35.83 |
| UNIDENTIFIED 10             | 4.46 | 0.0072 |  | -26.05 |
| Isoleucine 1                | 0.94 | 0.0073 |  | -28.97 |
| Tryptophan 4                | 7.29 | 0.0073 |  | -34.32 |
| Isoleucine 2                | 0.93 | 0.0074 |  | -29.89 |
| Beta-Alanine 1              | 3.17 | 0.0075 |  | -24.23 |
| Gamma-Glutamylcysteine 2    | 2.58 | 0.0075 |  | -14.88 |
| Flavin Mononucleotide       | 7.81 | 0.0076 |  | -36.70 |
| (R)-3-Hydroxybutyric Acid 2 | 2.42 | 0.0078 |  | -26.88 |
| (R)-3-Hydroxybutyric Acid 3 | 1.20 | 0.0078 |  | -52.53 |
| Glycerophosphocholine 2     | 3.69 | 0.0078 |  | 28.34  |
| Isoleucine 3                | 1.26 | 0.0078 |  | -20.34 |
| N-Acetylglutamate 1         | 2.23 | 0.0078 |  | -20.19 |
| Phenylalanine 4             | 3.16 | 0.0078 |  | -19.48 |
| Tyrosine 4                  | 3.08 | 0.0078 |  | -18.98 |
| Tyrosine 5                  | 3.07 | 0.0078 |  | -20.91 |
| UNIDENTIFIED 11             | 4.49 | 0.0078 |  | -23.03 |
| UNIDENTIFIED 12             | 2.32 | 0.0078 |  | -22.57 |
| UNIDENTIFIED 13             | 2.31 | 0.0078 |  | -28.06 |
| Proline 1                   | 3.34 | 0.008  |  | 18.45  |
| Gluconate                   | 4.13 | 0.0081 |  | 21.36  |
| Phenylalanine 5             | 7.44 | 0.0083 |  | -32.78 |
| Phenylalanine 6             | 7.37 | 0.0083 |  | -28.40 |
| 4-Hydroxyproline 2          | 2.16 | 0.0086 |  | -17.81 |
| Inosine 3                   | 4.44 | 0.0087 |  | -21.19 |
| Allantoin                   | 5.40 | 0.0089 |  | -30.92 |
| UNIDENTIFIED 14             | 0.95 | 0.009  |  | -30.19 |
| Glutamate 1                 | 2.11 | 0.0091 |  | -25.80 |
| UMP 2                       | 4.43 | 0.0092 |  | -24.52 |
| 1-Methyladenosine           | 6.09 | 0.0094 |  | -14.62 |
| UNIDENTIFIED 15             | 4.25 | 0.0094 |  | -22.29 |
| Norspermidine 1             | 1.69 | 0.0095 |  | -27.66 |
| O-Phosphocholine 2          | 3.24 | 0.0095 |  | 27.37  |
| Xanthine 1                  | 7.93 | 0.0095 |  | -30.11 |
| Gamma-Glutamylcysteine 3    | 2.17 | 0.0097 |  | -16.27 |
| Myoinositol 3               | 3.54 | 0.0098 |  | -8.45  |
| Glucose 1                   | 3.42 | 0.01   |  | 11.83  |
| Phenylalanine 7             | 7.38 | 0.0101 |  | -30.68 |
| UNIDENTIFIED 16             | 3.36 | 0.0101 |  | 12.00  |
| Myoinositol 4               | 3.64 | 0.0104 |  | -22.60 |
| Tyrosine 6                  | 6.91 | 0.0104 |  | -33.50 |
| UNIDENTIFIED 17             | 4.40 | 0.0105 |  | -19.78 |

|                                                             |      |        |  |        |
|-------------------------------------------------------------|------|--------|--|--------|
| UNIDENTIFIED 18                                             | 2.15 | 0.0107 |  | -22.45 |
| UNIDENTIFIED 19                                             | 5.99 | 0.0109 |  | 18.45  |
| Valine 3                                                    | 2.28 | 0.0113 |  | -26.72 |
| Pantothenic acid 1                                          | 0.92 | 0.0114 |  | -22.00 |
| Inosine 4                                                   | 6.08 | 0.0115 |  | -22.16 |
| Glucose 2                                                   | 3.89 | 0.0117 |  | 12.65  |
| L-Threonine 2                                               | 4.27 | 0.0117 |  | -20.98 |
| Niacinamide 1                                               | 7.60 | 0.0117 |  | -19.54 |
| Tyrosine 7                                                  | 3.09 | 0.0117 |  | -16.70 |
| UNIDENTIFIED 20                                             | 4.47 | 0.0117 |  | -25.14 |
| Uridine 2                                                   | 7.89 | 0.0117 |  | -34.37 |
| Uridine 3                                                   | 5.93 | 0.0117 |  | -37.72 |
| Uridine 4                                                   | 5.92 | 0.0117 |  | -37.22 |
| Xanthine 2                                                  | 7.91 | 0.0118 |  | -18.70 |
| Tryptophan 5                                                | 7.73 | 0.0121 |  | -32.14 |
| Myoinositol 10                                              | 3.30 | 0.0122 |  | -29.32 |
| L-Threonine 3                                               | 4.25 | 0.013  |  | -20.82 |
| Betaine and Trimethylamine N-Oxide                          | 3.27 | 0.0131 |  | -32.81 |
| UNIDENTIFIED 21                                             | 0.91 | 0.0136 |  | -27.43 |
| Ribose                                                      | 5.40 | 0.0138 |  | -22.85 |
| UNIDENTIFIED 22                                             | 7.57 | 0.0139 |  | -23.37 |
| UNIDENTIFIED 23                                             | 0.98 | 0.0139 |  | -27.71 |
| Myoinositol 5                                               | 3.56 | 0.0141 |  | -9.29  |
| UNIDENTIFIED 24                                             | 7.92 | 0.0143 |  | -18.63 |
| UNIDENTIFIED 25                                             | 1.70 | 0.0143 |  | -27.47 |
| Norspermidine 2                                             | 1.68 | 0.0145 |  | -22.91 |
| Gamma-Glutamylcysteine 4                                    | 2.59 | 0.0146 |  | -15.30 |
| Methionine                                                  | 2.14 | 0.0146 |  | -28.84 |
| Glucose 3                                                   | 3.43 | 0.0147 |  | 12.70  |
| Citric Acid 1                                               | 2.53 | 0.0149 |  | -15.65 |
| Glutamate 2                                                 | 2.07 | 0.0149 |  | -18.61 |
| Beta-Alanine 2 and Isocitrate 1 and Argininosuccinic acid 1 | 2.56 | 0.015  |  | -12.19 |
| Uridine 5                                                   | 5.91 | 0.015  |  | -31.84 |
| Valine 4                                                    | 2.28 | 0.015  |  | -26.66 |
| Myoinositol 6                                               | 3.56 | 0.0152 |  | -9.56  |
| Proline 2                                                   | 3.35 | 0.0152 |  | 17.50  |
| Myoinositol 7                                               | 3.31 | 0.0153 |  | -27.01 |
| Gamma-Glutamylcysteine 5                                    | 2.99 | 0.0154 |  | -12.54 |
| UNIDENTIFIED 26                                             | 2.49 | 0.0154 |  | -18.18 |
| Myoinositol 8                                               | 3.61 | 0.0159 |  | -22.07 |
| UNIDENTIFIED 27                                             | 1.42 | 0.0161 |  | -21.41 |
| (R)-3-Hydroxybutyric Acid 4                                 | 2.43 | 0.0163 |  | -28.10 |

|                                                           |      |        |         |        |
|-----------------------------------------------------------|------|--------|---------|--------|
| UNIDENTIFIED 28                                           | 0.96 | 0.0163 |         | -29.47 |
| Glucose 4                                                 | 3.39 | 0.0164 |         | 11.93  |
| UNIDENTIFIED 29                                           | 4.57 | 0.0164 |         | -30.89 |
| 1-Methyladenine                                           | 8.31 | 0.0166 |         | -15.59 |
| Dimethylamine                                             | 2.50 | 0.017  |         | -16.02 |
| Pantothenic acid 2                                        | 0.89 | 0.0176 |         | -25.76 |
| Phenylalanine 8                                           | 7.42 | 0.0177 |         | -26.17 |
| Phenylalanine 9                                           | 7.40 | 0.0178 |         | -25.88 |
| 7-Methyladenine 1                                         | 8.11 | 0.018  |         | -24.15 |
| Inosine triphosphate                                      | 8.50 | 0.0181 |         | -18.01 |
| N-Carbamoylaspartate 2                                    | 2.46 | 0.0181 |         | -37.36 |
| UNIDENTIFIED 30                                           | 1.64 | 0.0182 |         | -17.96 |
| UDP-N-Acetylglucosamine 1                                 | 5.98 | 0.0186 |         | 18.87  |
| Valine 5                                                  | 2.27 | 0.0186 |         | -24.88 |
| Valine 6                                                  | 2.27 | 0.0191 |         | -24.55 |
| Gamma-Glutamylcysteine 6                                  | 2.22 | 0.0195 |         | -16.39 |
| Gamma-Glutamylcysteine 7                                  | 2.21 | 0.0195 |         | -15.16 |
| Gamma-Glutamylcysteine 8                                  | 2.20 | 0.0195 |         | -15.18 |
| Glucose 5                                                 | 3.71 | 0.0195 | 0.00312 | 17.22  |
| Isoleucine 4                                              | 1.26 | 0.0195 |         | -15.96 |
| N-Acetylglutamate 2                                       | 2.24 | 0.0195 |         | -19.70 |
| Niacinamide 2                                             | 7.62 | 0.0195 |         | -20.02 |
| Nicotinurate 1                                            | 7.61 | 0.0195 |         | -16.33 |
| Tryptophan 6                                              | 7.28 | 0.0195 |         | -28.97 |
| Tryptophan 7                                              | 7.30 | 0.0195 |         | -30.56 |
| Tyrosine 8                                                | 3.06 | 0.0195 |         | -11.85 |
| UDP-N-Acetylglucosamine 2                                 | 5.98 | 0.0195 |         | 22.09  |
| UNIDENTIFIED 31                                           | 4.56 | 0.0195 |         | -28.46 |
| UNIDENTIFIED 32                                           | 4.49 | 0.0195 |         | -20.11 |
| UNIDENTIFIED 33                                           | 4.48 | 0.0195 |         | -22.41 |
| UNIDENTIFIED 34                                           | 1.18 | 0.0195 |         | -18.12 |
| Isoleucine 5                                              | 1.02 | 0.0196 |         | -26.51 |
| Fucose                                                    | 4.55 | 0.0203 |         | -21.26 |
| Citric Acid 2                                             | 2.57 | 0.0204 |         | -12.16 |
| Argininosuccinic acid 2                                   | 2.54 | 0.0205 |         | -12.79 |
| Selenomethionine 1                                        | 2.64 | 0.0207 |         | -26.55 |
| Adenosine Monophosphate 1                                 | 8.60 | 0.021  | 0.00275 | 41.94  |
| Proline 3                                                 | 3.35 | 0.0211 |         | 19.15  |
| UNIDENTIFIED 35                                           | 4.14 | 0.0217 |         | 15.45  |
| Adenosine Monophosphate 2 and<br>Cytidine Monophosphate 1 | 6.15 | 0.0221 |         | 34.84  |
| Selenomethionine 2                                        | 2.65 | 0.0226 |         | -26.70 |
| Nicotinurate 2                                            | 8.72 | 0.0234 |         | -14.76 |

|                                                        |      |        |  |        |
|--------------------------------------------------------|------|--------|--|--------|
| L-Threonine 4                                          | 4.26 | 0.0238 |  | -18.65 |
| Norspermidine 3                                        | 1.67 | 0.024  |  | -18.87 |
| Glycerophosphocholine 3                                | 3.68 | 0.0247 |  | 18.22  |
| UNIDENTIFIED 36                                        | 1.63 | 0.0261 |  | -15.65 |
| UNIDENTIFIED 37                                        | 1.15 | 0.0261 |  | -18.95 |
| Adenine                                                | 8.22 | 0.0264 |  | -23.43 |
| UMP 3                                                  | 8.09 | 0.0264 |  | -49.31 |
| Tryptophan 8                                           | 7.56 | 0.0265 |  | -23.45 |
| UNIDENTIFIED 38                                        | 1.43 | 0.0266 |  | -19.37 |
| Thiamine pyrophosphate                                 | 8.05 | 0.027  |  | -16.90 |
| Fructose                                               | 4.03 | 0.0273 |  | 15.22  |
| Glucose 10                                             | 3.53 | 0.0273 |  | 6.84   |
| Glucose 11                                             | 3.45 | 0.0273 |  | 13.62  |
| Glucose 12                                             | 3.80 | 0.0273 |  | 8.44   |
| Glucose 6                                              | 5.24 | 0.0273 |  | 21.35  |
| Glucose 7                                              | 3.86 | 0.0273 |  | 10.57  |
| Glucose 8                                              | 3.84 | 0.0273 |  | 13.22  |
| Glucose 9                                              | 3.83 | 0.0273 |  | 12.71  |
| Nicotinurate 3                                         | 8.95 | 0.0273 |  | -15.33 |
| Nicotinurate 4                                         | 8.71 | 0.0273 |  | -14.90 |
| S-Adenosylhomocysteine 1                               | 8.39 | 0.0273 |  | -26.52 |
| Uridine 6                                              | 4.36 | 0.0273 |  | -25.18 |
| Valine 7                                               | 2.26 | 0.0275 |  | -21.66 |
| Valine 8                                               | 0.99 | 0.0282 |  | -23.44 |
| Inosine 5 and Hypoxanthine                             | 8.23 | 0.0302 |  | -23.67 |
| Uridine 7                                              | 5.94 | 0.0304 |  | -29.41 |
| Argininosuccinic acid 3 and Isocitrate 2               | 2.52 | 0.0312 |  | -12.97 |
| S-Adenosylhomocysteine 1 and Inosine 5 and Adenosine   | 8.36 | 0.0323 |  | -9.50  |
| Isocitrate 3                                           | 2.51 | 0.0327 |  | -13.26 |
| Myoinositol 9                                          | 3.55 | 0.0336 |  | -8.70  |
| Methionine Sulfoxide                                   | 2.77 | 0.034  |  | -20.13 |
| UNIDENTIFIED 39                                        | 1.66 | 0.0347 |  | -17.11 |
| 7-Methyladenine 2                                      | 8.19 | 0.0358 |  | -13.83 |
| Adenosine Monophosphate 3 and Cytidine Monophosphate 2 | 6.14 | 0.0365 |  | 29.75  |
| Isoleucine 6                                           | 1.01 | 0.0366 |  | -24.80 |
| Valine 9                                               | 1.04 | 0.037  |  | -23.31 |
| Imidazole                                              | 8.32 | 0.0373 |  | 6.19   |
| UNIDENTIFIED 40                                        | 3.85 | 0.0374 |  | 10.16  |
| Glucose 13                                             | 3.78 | 0.0385 |  | 3.73   |
| Glutamate 3                                            | 2.13 | 0.0389 |  | -21.32 |
| (R)-3-Hydroxybutyric Acid 5                            | 2.39 | 0.0391 |  | -22.09 |
| Beta-Alanine 3                                         | 3.18 | 0.0391 |  | -16.47 |

|                               |                                     |            |         |          |        |
|-------------------------------|-------------------------------------|------------|---------|----------|--------|
|                               | Glucose 14                          | 3.84       | 0.0391  |          | 14.28  |
|                               | Glucose 15                          | 3.76       | 0.0391  |          | 11.64  |
|                               | Glucose 16                          | 3.73       | 0.0391  |          | 13.64  |
|                               | Glucose 17                          | 3.72       | 0.0391  |          | 15.32  |
|                               | Glycogen                            | 5.41       | 0.0391  |          | 45.07  |
|                               | L-Threonine 5                       | 4.25       | 0.0391  |          | -17.25 |
|                               | N-Acetylglutamate 3                 | 2.25       | 0.0391  |          | -19.22 |
|                               | Nicotinurate 5                      | 8.73       | 0.0391  |          | -15.74 |
|                               | Nicotinurate 6                      | 7.62       | 0.0391  |          | -15.76 |
|                               | Phenylalanine 10                    | 3.15       | 0.0391  |          | -20.66 |
|                               | Phenylalanine 11                    | 3.14       | 0.0391  |          | -17.66 |
|                               | Tyrosine 9 and Beta-Alanine 4       | 3.19       | 0.0391  |          | -16.04 |
|                               | UNIDENTIFIED 41                     | 4.52       | 0.0391  |          | -16.81 |
|                               | Uridine 8                           | 4.24       | 0.0391  |          | -21.65 |
|                               | Uridine 9                           | 4.23       | 0.0391  |          | -18.24 |
|                               | UNIDENTIFIED 42                     | 0.90       | 0.0394  |          | -22.91 |
|                               | Pi-Methylhistidine                  | 7.16       | 0.0397  |          | -24.13 |
|                               | UNIDENTIFIED 43                     | 2.42       | 0.0422  |          | -25.33 |
|                               | Methylmalonate 1                    | 1.24       | 0.0427  |          | -16.16 |
|                               | Methylmalonate 2                    | 1.23       | 0.0432  |          | -15.63 |
|                               | UDP-N-Acetylglucosamine 3           | 7.95       | 0.0434  |          | 8.70   |
|                               | UNIDENTIFIED 44                     | 3.62       | 0.0437  |          | -13.62 |
|                               | Valine 10                           | 1.05       | 0.045   |          | -23.13 |
|                               | UNIDENTIFIED 45                     | 1.65       | 0.0451  |          | -16.78 |
|                               | Anserine                            | 7.15       | 0.0454  |          | -20.47 |
|                               | Gamma-Glutamylcysteine 9            | 2.98       | 0.0461  |          | -10.03 |
|                               | Glutamate 4                         | 2.10       | 0.0472  |          | -16.12 |
|                               | UNIDENTIFIED 46                     | 1.65       | 0.0481  |          | -15.62 |
|                               | Glycerol                            | 3.81       | 0.0488  |          | 5.69   |
|                               | 3-Methyladenine                     | 8.29       | 0.0492  |          | 20.31  |
|                               | Thiamine                            | 8.06       | 0.0493  |          | -17.94 |
|                               | 3-Mercaptopyruvic Acid              | 2.86       | 0.0547  | 0.00208  | 11.19  |
|                               | Threonate                           | 4.02       | 0.2451  | 0.00039  | 6.81   |
| 30 mg L <sup>-1</sup><br>CORT | Betaine and Trimethylamine N-Oxide  | 3.274811   | 0.00001 | 1.40E-03 | -55.02 |
|                               | Coenzyme A                          | 0.762045   | 0.00001 |          | -43.08 |
|                               | Glycerophosphocholine 1             | 3.69339025 | 0.00001 |          | 48.05  |
|                               | Mannose                             | 5.19833    | 0.00001 |          | 75.00  |
|                               | UNIDENTIFIED 1                      | 3.8724865  | 0.00001 | 9.85E-04 | 26.44  |
|                               | UNIDENTIFIED 2                      | 3.6352585  | 0.00001 |          | 21.92  |
|                               | UNIDENTIFIED 3                      | 3.16603875 | 0.00001 |          | -36.08 |
|                               | Glycerophosphocholine 2 and Maltose | 3.67813075 | 0.0001  |          | 39.49  |
|                               | Glycerophosphocholine 3             | 3.68501725 | 0.0002  | 7.60E-04 | 50.20  |
|                               | Quinone                             | 6.81344075 | 0.0002  |          | -55.24 |

|                             |            |        |  |        |
|-----------------------------|------------|--------|--|--------|
| 1-Methylguanosine           | 8.01996375 | 0.0003 |  | -35.27 |
| Glycerophosphocholine 4     | 3.2250335  | 0.0004 |  | 42.15  |
| Inosine 1                   | 4.451543   | 0.0004 |  | -27.68 |
| Tryptophan 1                | 7.55075    | 0.0004 |  | -38.80 |
| O-Phosphocholine 1          | 3.5931865  | 0.0005 |  | 31.26  |
| Nicotinurate 1              | 8.253198   | 0.0008 |  | -22.60 |
| Tryptophan 2                | 7.733      | 0.0009 |  | -26.08 |
| Allantoin 1                 | 5.3965     | 0.0011 |  | -33.81 |
| Tryptophan 3                | 7.28869675 | 0.0012 |  | -32.83 |
| Tryptophan 4                | 7.214888   | 0.0012 |  | -33.75 |
| Valine 1                    | 2.289244   | 0.0012 |  | -27.33 |
| Phenylalanine 1             | 7.447597   | 0.0013 |  | -36.26 |
| Nicotinurate 2              | 8.7221     | 0.0015 |  | -26.86 |
| Tyrosine 1                  | 7.1892     | 0.0015 |  | -36.82 |
| Myoinositol 1               | 4.0815     | 0.0016 |  | -34.35 |
| O-Phosphocholine 2          | 3.236193   | 0.0016 |  | 45.15  |
| 4-Hydroxyproline            | 3.3730335  | 0.0019 |  | -25.92 |
| UNIDENTIFIED 4              | 4.248287   | 0.002  |  | -21.32 |
| Beta-Alanine 1              | 3.17114475 | 0.0022 |  | -30.05 |
| UNIDENTIFIED 5              | 3.95       | 0.0022 |  | 26.25  |
| Glucose 1                   | 3.7765     | 0.0023 |  | 4.89   |
| UNIDENTIFIED 6              | 3.848027   | 0.0023 |  | 10.55  |
| Gluconate                   | 4.127      | 0.0024 |  | 29.28  |
| Tyrosine 2                  | 7.204088   | 0.0024 |  | -35.70 |
| Valine 2                    | 2.2769985  | 0.0024 |  | -24.99 |
| Isoleucine 1                | 0.9422585  | 0.0027 |  | -33.68 |
| Histamine 1                 | 7.93006425 | 0.0028 |  | -44.51 |
| Inosine 2                   | 4.4453885  | 0.0028 |  | -22.06 |
| Inosine 3                   | 6.08357225 | 0.0029 |  | -31.71 |
| Tryptophan 5                | 7.277904   | 0.003  |  | -27.31 |
| 7-Methyladenine 1           | 8.1092455  | 0.0031 |  | -26.10 |
| Inosine triphosphate        | 8.5015     | 0.0031 |  | -24.98 |
| Myoinositol 2               | 3.6284505  | 0.0031 |  | -24.92 |
| Myoinositol 3               | 3.312      | 0.0032 |  | -24.39 |
| Tryptophan 6                | 7.56175    | 0.0033 |  | -27.83 |
| UDP-N-Acetylglucosamine 1   | 5.97683275 | 0.0034 |  | 41.80  |
| Valine 3                    | 2.281673   | 0.0034 |  | -25.11 |
| Tyrosine 3                  | 6.9070865  | 0.0038 |  | -36.27 |
| (R)-3-Hydroxybutyric Acid 1 | 1.2171995  | 0.0039 |  | -35.05 |
| Glucose 2                   | 3.8908375  | 0.0039 |  | 11.25  |
| Glucose 3                   | 3.85905    | 0.0039 |  | 12.93  |
| Glucose 4                   | 3.830115   | 0.0039 |  | 11.62  |
| Glucose 5                   | 3.70511225 | 0.0039 |  | 15.95  |

|                                       |            |        |  |        |
|---------------------------------------|------------|--------|--|--------|
| Glucose 6 and Glycerophosphocholine 5 | 3.2476595  | 0.0039 |  | 20.84  |
| Glycogen 1                            | 5.436698   | 0.0039 |  | 41.55  |
| Glycogen 2                            | 5.4231095  | 0.0039 |  | 58.92  |
| Glycogen 3                            | 5.4149115  | 0.0039 |  | 51.66  |
| NADP+                                 | 9.303      | 0.0039 |  | 40.69  |
| Nicotinurate 3                        | 8.9535     | 0.0039 |  | -23.92 |
| Nicotinurate 4                        | 8.7258     | 0.0039 |  | -27.84 |
| Nicotinurate 5                        | 8.71475    | 0.0039 |  | -25.78 |
| Nicotinurate 6                        | 7.624      | 0.0039 |  | -24.39 |
| Nicotinurate 7                        | 7.615      | 0.0039 |  | -25.20 |
| Nicotinurate 8                        | 7.609      | 0.0039 |  | -25.09 |
| Nicotinurate 9                        | 7.601      | 0.0039 |  | -27.14 |
| Phenylalanine 2                       | 7.43567725 | 0.0039 |  | -42.46 |
| Phenylalanine 3                       | 7.3454015  | 0.0039 |  | -49.18 |
| Phenylalanine 4                       | 7.3313645  | 0.0039 |  | -49.59 |
| Phenylalanine 5                       | 3.1581545  | 0.0039 |  | -26.59 |
| Phenylalanine 6                       | 3.1452235  | 0.0039 |  | -26.75 |
| Phenylalanine 7                       | 3.136225   | 0.0039 |  | -24.29 |
| S-Adenosylhomocysteine                | 8.3945     | 0.0039 |  | -23.91 |
| Selenomethionine 1                    | 2.63583075 | 0.0039 |  | -34.74 |
| Tyrosine 4                            | 6.9235865  | 0.0039 |  | -35.95 |
| Tyrosine 5                            | 3.079      | 0.0039 |  | -20.60 |
| Tyrosine 6                            | 3.07036725 | 0.0039 |  | -22.32 |
| UNIDENTIFIED 7                        | 3.181      | 0.0039 |  | -22.75 |
| UNIDENTIFIED 8                        | 3.1744625  | 0.0039 |  | -20.60 |
| UNIDENTIFIED 9                        | 3.1517965  | 0.0039 |  | -26.52 |
| UNIDENTIFIED 10                       | 2.3206385  | 0.0039 |  | -24.36 |
| UNIDENTIFIED 11                       | 2.3084785  | 0.0039 |  | -26.53 |
| Valine 4                              | 2.2992225  | 0.0039 |  | -31.43 |
| UNIDENTIFIED 12                       | 0.95341    | 0.004  |  | -34.29 |
| Tryptophan 7                          | 7.7455     | 0.0041 |  | -22.86 |
| Nicotinurate 10                       | 8.27271725 | 0.0042 |  | -16.74 |
| Threonine 1                           | 4.2810135  | 0.0043 |  | -20.05 |
| Valine 5                              | 2.26676675 | 0.0044 |  | -24.26 |
| Phosphocreatine                       | 3.958      | 0.0045 |  | 25.44  |
| Isoleucine 2                          | 0.9329915  | 0.0048 |  | -31.49 |
| O-Phosphocholine 3                    | 3.606269   | 0.0048 |  | 16.80  |
| UNIDENTIFIED 13                       | 4.4564145  | 0.0051 |  | -27.19 |
| UNIDENTIFIED 14                       | 3.967      | 0.0059 |  | 21.58  |
| Uridine 1                             | 7.8785     | 0.0066 |  | -29.06 |
| Myoinositol 4                         | 3.641821   | 0.0067 |  | -20.15 |
| UNIDENTIFIED 15                       | 0.964489   | 0.007  |  | -33.19 |



|                             |            |        |  |        |
|-----------------------------|------------|--------|--|--------|
| Myoinositol 5               | 3.6147985  | 0.0072 |  | -15.87 |
| (R)-3-Hydroxybutyric Acid 2 | 2.426871   | 0.0077 |  | -26.07 |
| Beta-Alanine 2              | 3.1915     | 0.0078 |  | -21.22 |
| Glucose 7                   | 5.2418     | 0.0078 |  | 13.95  |
| Glucose 8                   | 3.843958   | 0.0078 |  | 10.86  |
| Glucose 9                   | 3.837573   | 0.0078 |  | 10.78  |
| Glutamate 1                 | 2.107325   | 0.0078 |  | -31.24 |
| Glutamate 2                 | 2.06925    | 0.0078 |  | -23.25 |
| Glycine                     | 3.5715     | 0.0078 |  | -15.30 |
| Nicotinurate 11             | 8.73345    | 0.0078 |  | -20.45 |
| Norspermidine 1             | 1.68882425 | 0.0078 |  | -27.78 |
| Phenylalanine 8             | 7.41981125 | 0.0078 |  | -35.88 |
| Phenylalanine 9             | 7.3996215  | 0.0078 |  | -36.29 |
| Phenylalanine 10            | 7.3839405  | 0.0078 |  | -42.74 |
| Phenylalanine 11            | 7.37366075 | 0.0078 |  | -34.63 |
| Isoleucine 3                | 1.02094425 | 0.0079 |  | -28.43 |
| UNIDENTIFIED 16             | 0.976129   | 0.008  |  | -30.51 |
| Isoleucine 4                | 1.00844425 | 0.0084 |  | -28.38 |
| Valine 6                    | 2.271912   | 0.0086 |  | -20.44 |
| UNIDENTIFIED 17             | 2.3156385  | 0.0088 |  | -22.14 |
| Flavin Mononucleotide       | 7.8095     | 0.0089 |  | -35.37 |
| Glucose 10                  | 3.430133   | 0.0091 |  | 9.80   |
| Inosine 4 and Hypoxanthine  | 8.2305     | 0.0097 |  | -37.39 |
| Lactate 1                   | 4.1205     | 0.0099 |  | 26.44  |
| Acetylcholine               | 2.142      | 0.0102 |  | -30.99 |
| Adenosine monophosphate 1   | 8.598      | 0.0108 |  | 45.52  |
| Uridine 2                   | 5.9215235  | 0.011  |  | -30.78 |
| Glutamate 3                 | 2.1007245  | 0.0113 |  | -20.24 |
| Ribose                      | 5.402      | 0.0113 |  | -24.18 |
| (R)-3-Hydroxybutyric Acid 3 | 2.41629    | 0.0117 |  | -24.98 |
| (R)-3-Hydroxybutyric Acid 4 | 1.2005     | 0.0117 |  | -39.53 |
| Gamma-Glutamylcysteine 1    | 2.21658675 | 0.0117 |  | -16.64 |
| Gamma-Glutamylcysteine 2    | 2.19575175 | 0.0117 |  | -14.98 |
| Glucose 11                  | 3.797585   | 0.0117 |  | 8.74   |
| Glucose 12                  | 3.7555     | 0.0117 |  | 8.17   |
| Selenomethionine 2          | 2.647295   | 0.0117 |  | -33.69 |
| Tryptophan 8                | 7.29929275 | 0.0118 |  | -28.82 |
| UNIDENTIFIED 18             | 0.8680155  | 0.0118 |  | -29.99 |
| Glycerophosphocholine 6     | 4.3325     | 0.0121 |  | 39.67  |
| Valine 7                    | 0.9887275  | 0.0121 |  | -25.56 |
| Adenosine                   | 8.1415     | 0.0122 |  | 29.65  |
| Adenine                     | 8.2165     | 0.0128 |  | -33.95 |
| Glycerol 1                  | 3.8075     | 0.0141 |  | 9.76   |

|                             |            |        |  |        |
|-----------------------------|------------|--------|--|--------|
| Myoinositol 6               | 3.557273   | 0.0146 |  | -11.58 |
| Norspermidine 2             | 1.67632325 | 0.0153 |  | -23.13 |
| UMP 1                       | 4.42397    | 0.0154 |  | -26.08 |
| Uridine 3                   | 5.9120235  | 0.0155 |  | -24.23 |
| Threonine 2                 | 4.27273825 | 0.0161 |  | -17.57 |
| UNIDENTIFIED 19             | 4.4624675  | 0.0161 |  | -24.73 |
| Myoinositol 7               | 3.541      | 0.0164 |  | -11.55 |
| Inosine 5                   | 4.4383065  | 0.0165 |  | -18.87 |
| UDP-glucose                 | 5.989744   | 0.0169 |  | 32.96  |
| Pi-Methylhistidine          | 7.1644     | 0.017  |  | -23.31 |
| Glucose 13                  | 3.4151865  | 0.018  |  | 11.87  |
| Uridine 4                   | 5.9298575  | 0.0183 |  | -29.03 |
| Methionine Sulfoxide        | 2.7659685  | 0.0184 |  | -23.30 |
| UNIDENTIFIED 20             | 7.9168785  | 0.0187 |  | -20.02 |
| Valine 8                    | 1.037221   | 0.0187 |  | -25.19 |
| Glycerol 2                  | 3.81235    | 0.0188 |  | 8.99   |
| Threonine 3                 | 4.254254   | 0.0191 |  | -17.16 |
| Gamma-Glutamylcysteine 3    | 2.2056115  | 0.0195 |  | -14.49 |
| Glucose 14                  | 3.446852   | 0.0195 |  | 9.57   |
| N-Acetylglutamate 1         | 2.228325   | 0.0195 |  | -17.97 |
| N-Methylhydantoin 1         | 4.099      | 0.0195 |  | -20.63 |
| UDP-N-Acetylglucosamine 2   | 5.96753825 | 0.0195 |  | 32.60  |
| UNIDENTIFIED 21             | 7.573      | 0.0195 |  | -18.25 |
| UNIDENTIFIED 22             | 4.48502425 | 0.0195 |  | -23.62 |
| UNIDENTIFIED 23             | 4.47825525 | 0.0195 |  | -22.29 |
| UNIDENTIFIED 24             | 4.36566    | 0.0195 |  | -19.62 |
| UNIDENTIFIED 25             | 1.702597   | 0.0195 |  | -28.60 |
| Uridine 5                   | 4.3613245  | 0.0195 |  | -24.69 |
| Uridine 6                   | 4.2407     | 0.0195 |  | -19.58 |
| Valine 9                    | 0.9993275  | 0.0212 |  | -22.16 |
| UNIDENTIFIED 26             | 4.41       | 0.0218 |  | -22.82 |
| Valine 10                   | 2.25968475 | 0.022  |  | -17.86 |
| Adenosine monophosphate 2   | 6.152      | 0.0224 |  | 43.18  |
| Lactate 2                   | 4.1421505  | 0.0227 |  | 11.07  |
| Valine 11                   | 1.051221   | 0.0236 |  | -25.81 |
| UNIDENTIFIED 27             | 4.404      | 0.0251 |  | -19.36 |
| Myoinositol 8               | 3.2992265  | 0.0255 |  | -21.20 |
| Allantoin 2                 | 5.39       | 0.0256 |  | -20.86 |
| 7-Methyladenine 2           | 8.18565    | 0.0257 |  | -13.35 |
| Choline                     | 4.0672235  | 0.0261 |  | -17.16 |
| Myoinositol 9               | 3.5485     | 0.0264 |  | -10.81 |
| (R)-3-Hydroxybutyric Acid 5 | 2.4213375  | 0.0273 |  | -26.68 |
| Glucose 15                  | 3.74596475 | 0.0273 |  | 7.27   |

|                                  |            |        |  |        |
|----------------------------------|------------|--------|--|--------|
| Tyrosine 7                       | 3.0902355  | 0.0273 |  | -15.01 |
| UNIDENTIFIED 28                  | 3.9405     | 0.0273 |  | 23.54  |
| Uridine 7                        | 4.23414275 | 0.0273 |  | -15.68 |
| Adenosine Triphosphate           | 8.547      | 0.0295 |  | 39.03  |
| Lactate and Gluconate            | 4.1321445  | 0.0299 |  | 18.66  |
| Threonine 4                      | 4.26354675 | 0.0307 |  | -16.72 |
| Glucose 16                       | 3.7865425  | 0.0325 |  | 5.65   |
| Imidazole                        | 8.32305    | 0.0342 |  | 14.44  |
| N-Methylhydantoin 2              | 2.929548   | 0.0358 |  | -23.91 |
| Pantothenic acid                 | 0.9227405  | 0.0366 |  | -20.80 |
| Myoinositol 10                   | 3.563      | 0.0372 |  | -9.69  |
| Sucrose                          | 4.0632235  | 0.0381 |  | -13.70 |
| O-Phosphocholine 4               | 3.5996425  | 0.0388 |  | 14.67  |
| Glucose 17                       | 3.7282915  | 0.0391 |  | 8.49   |
| Glucose 18                       | 3.718924   | 0.0391 |  | 8.99   |
| Glucose 19                       | 3.462855   | 0.0391 |  | 8.62   |
| Glucose 20                       | 4.6792105  | 0.0391 |  | 7.88   |
| N-Acetylglutamate 2              | 2.23953475 | 0.0391 |  | -15.84 |
| N-Carbamoylaspartate             | 2.47906925 | 0.0391 |  | -27.81 |
| Tyrosine 8                       | 3.2005     | 0.0391 |  | -16.18 |
| UDP-N-Acetylglucosamine 3        | 5.9837385  | 0.0391 |  | 35.01  |
| UNIDENTIFIED 29                  | 4.470371   | 0.0391 |  | -23.05 |
| UMP 2 and Cytidine Monophosphate | 8.09032775 | 0.0405 |  | -49.99 |
| Carnosine and Histamine 2        | 7.149295   | 0.0414 |  | -22.55 |
| Norspermidine 3                  | 1.66812625 | 0.0417 |  | -18.63 |
| Glucose 21                       | 3.39272    | 0.042  |  | 6.38   |
| UNIDENTIFIED 30                  | 0.911374   | 0.0429 |  | -22.58 |
| UMP 3                            | 4.430931   | 0.0433 |  | -20.99 |
| Proline                          | 3.336      | 0.0437 |  | 15.76  |
| Glucose 22                       | 4.6503985  | 0.0445 |  | 8.27   |
| 7-Methyladenine 3                | 4.0585     | 0.045  |  | -12.64 |
| UDP-N-Acetylglucosamine 4        | 7.9454045  | 0.0467 |  | 22.49  |
| Glutamate 4                      | 2.059403   | 0.0486 |  | -15.62 |
| Uridine 8                        | 7.8935     | 0.0492 |  | -21.80 |

**Table S4.** *P*-values of metabolites found to be significant altered in breast muscle of birds administered 10 mg L<sup>-1</sup> corticosterone (**CORT**) and 30 mg L<sup>-1</sup> CORT as compared to ethanol alone as determined by a paired T-test and/or the variable importance analysis based on random variable combination analysis. Metabolite regulation is shown as a percentage of the difference between the CORT treatment vs ethanol treatment. Metabolites for which more than one nuclear magnetic resonance peak was identified as significant are represented as metabolite 1, metabolite 2, ... metabolite n.

| Treatment                  | Metabolite                                            | Chemical shift (ppm) | T-test <i>P</i> -value | VIAVC <i>P</i> -value | Regulation |
|----------------------------|-------------------------------------------------------|----------------------|------------------------|-----------------------|------------|
| 10 mg L <sup>-1</sup> CORT | Glucose 1                                             | 3.90                 | 0.001                  |                       | 22.54      |
|                            | Glucose 2                                             | 3.84                 | 0.001                  | 1.61E-07              | 19.00      |
|                            | Glycine and Glycerol 1                                | 3.57                 | 0.0022                 |                       | 28.44      |
|                            | UNIDENTIFIED 1                                        | 8.26                 | 0.0023                 |                       | -69.84     |
|                            | Glucose 3                                             | 3.73                 | 0.0026                 |                       | 19.55      |
|                            | Glucose 4                                             | 3.75                 | 0.0042                 |                       | 17.89      |
|                            | Glucose-6-phosphate 1 and Nicotinurate                | 4.00                 | 0.0055                 |                       | 33.76      |
|                            | Glucose-6-phosphate 2                                 | 4.02                 | 0.0061                 |                       | 12.99      |
|                            | Inosine 1 and Glucose-6-Phosphate 3                   | 3.89                 | 0.0064                 |                       | 43.44      |
|                            | Glucose 5 and Glucose-6-Phosphate 4                   | 3.52                 | 0.0076                 |                       | 48.08      |
|                            | Inosine 2 and Glucose-6-Phosphate 5                   | 3.87                 | 0.008                  |                       | 38.83      |
|                            | Glucose 6 and Myoinositol 1                           | 3.53                 | 0.0098                 |                       | 53.29      |
|                            | Glucose 7 and Glucose-6-Phosphate 6                   | 5.26                 | 0.0103                 |                       | 43.54      |
|                            | Glucose 8 and Glucose-6-Phosphate 7 and Myoinositol 2 | 3.55                 | 0.0124                 |                       | 38.38      |
|                            | Glucose 9 and Glucose-6-Phosphate 8                   | 3.51                 | 0.0128                 |                       | 28.27      |
|                            | UNIDENTIFIED 2                                        | 4.01                 | 0.0136                 |                       | 21.87      |
|                            | Glucose 10                                            | 3.72                 | 0.0178                 |                       | 19.16      |
|                            | Glucose 11 and Carnitine                              | 3.43                 | 0.0195                 |                       | 15.09      |
|                            | UNIDENTIFIED 3                                        | 4.01                 | 0.0203                 |                       | 33.85      |
|                            | Glucose 12 and Glycerol 2                             | 3.56                 | 0.0204                 |                       | 27.44      |
|                            | 1,5-Anhydrosorbitol 1                                 | 3.98                 | 0.022                  |                       | 30.14      |
|                            | Creatine phosphate                                    | 3.03                 | 0.0254                 |                       | -16.49     |
|                            | UNIDENTIFIED 4                                        | 3.96                 | 0.0273                 |                       | 57.96      |
|                            | 1,5-Anhydrosorbitol 2                                 | 3.97                 | 0.0283                 |                       | 29.97      |
|                            | UNIDENTIFIED 5                                        | 3.82                 | 0.0286                 |                       | 24.57      |
|                            | Glucose-6-phosphate 9                                 | 3.29                 | 0.0356                 |                       | 32.09      |
|                            | Creatinine                                            | 4.07                 | 0.0377                 |                       | 13.26      |
|                            | Glucose-6-phosphate 10                                | 5.25                 | 0.039                  |                       | 28.39      |
|                            | Anserine 1                                            | 2.71                 | 0.04                   |                       | -14.48     |
|                            | Betaine                                               | 3.90                 | 0.0443                 |                       | 18.91      |
|                            | UNIDENTIFIED 6                                        | 3.86                 | 0.0447                 |                       | 17.93      |
|                            | N-Methylhydantoin                                     | 2.93                 | 0.1061                 | 1.02E-32              | -25.42     |
|                            | UNIDENTIFIED 7                                        | 8.57                 | 0.1289                 | 4.80E-07              | 11.44      |

|                               |                                                       |      |         |          |        |
|-------------------------------|-------------------------------------------------------|------|---------|----------|--------|
|                               | Glucose 13                                            | 3.71 | 0.2629  | 5.48E-08 | 16.68  |
|                               | Glucose 14                                            | 3.83 | 0.3878  | 9.75E-20 | 15.37  |
|                               | Glucose 15                                            | 3.69 | 0.4453  | 8.14E-21 | 11.71  |
|                               | UNIDENTIFIED 8                                        | 3.06 | 0.6912  | 1.18E-13 | 2.26   |
|                               | S-Adenosylhomocysteine 1                              | 2.17 | 0.6916  | 4.16E-11 | -6.19  |
|                               | Anserine 2                                            | 2.67 | 0.8203  | 7.23E-13 | -1.26  |
|                               | S-Adenosylhomocysteine 2                              | 2.19 | 0.8461  | 1.33E-14 | -2.61  |
| 30 mg L <sup>-1</sup><br>CORT | Glucose 1                                             | 3.43 | 0.00001 |          | 43.97  |
|                               | Glucose 2 and Glucose-6-Phosphate 1                   | 5.26 | 0.00001 |          | 77.26  |
|                               | Glucose 3 and Glucose-6-Phosphate 2                   | 3.51 | 0.00001 |          | 56.99  |
|                               | Glucose 4 and Glucose-6-Phosphate 3 and Myoinositol 1 | 3.55 | 0.00001 |          | 72.65  |
|                               | Glucose 5 and Glycerol 1                              | 3.56 | 0.00001 |          | 55.13  |
|                               | Glucose-6-phosphate 4                                 | 3.72 | 0.00001 |          | 41.01  |
|                               | Histamine 1                                           | 3.03 | 0.00001 |          | -28.33 |
|                               | Inosine 1 and Glucose-6-Phosphate 1                   | 3.89 | 0.00001 |          | 76.84  |
|                               | Glucose-6-phosphate 2                                 | 4.02 | 0.0001  |          | 19.55  |
|                               | Histamine 2                                           | 3.02 | 0.0001  |          | -47.40 |
|                               | Glucose-6-phosphate 3                                 | 3.29 | 0.0003  |          | 54.51  |
|                               | Glucose 6                                             | 3.41 | 0.0004  |          | 29.60  |
|                               | Glucose 7 and Glucose-6-Phosphate 4                   | 5.25 | 0.0004  |          | 57.35  |
|                               | Glucose-6-phosphate 5                                 | 4.01 | 0.0005  |          | 36.30  |
|                               | Glucose 8                                             | 3.82 | 0.0006  |          | 34.76  |
|                               | Glucose 9 and Glycerol 2                              | 3.56 | 0.0006  |          | 42.46  |
|                               | Glutathione 1                                         | 3.00 | 0.0006  |          | -69.36 |
|                               | Anserine 1                                            | 3.07 | 0.0007  |          | -29.23 |
|                               | Glucose 10                                            | 3.26 | 0.0007  |          | 23.34  |
|                               | Anserine 2                                            | 3.09 | 0.001   |          | -41.91 |
|                               | Glucose 11 and Betaine 1                              | 3.91 | 0.0012  |          | 33.48  |
|                               | Citric acid                                           | 2.64 | 0.0016  |          | -44.84 |
|                               | 1,5-Anhydrosorbitol 1                                 | 3.98 | 0.0017  |          | 45.55  |
|                               | Acetic acid and Acetylphosphate                       | 1.93 | 0.0022  |          | -43.83 |
|                               | Carnosine 1                                           | 8.08 | 0.0023  |          | -78.86 |
|                               | N-Methylhydantoin                                     | 2.93 | 0.0023  |          | -61.90 |
|                               | Proline 1                                             | 2.35 | 0.0023  |          | -39.43 |
|                               | 1,5-Anhydrosorbitol 2                                 | 3.97 | 0.0027  |          | 42.68  |
|                               | Proline 2                                             | 2.34 | 0.003   |          | -44.44 |
|                               | UNIDENTIFIED 2                                        | 4.01 | 0.003   |          | 52.87  |
|                               | Glucose 12                                            | 3.90 | 0.0039  |          | 46.98  |
|                               | Glucose 13                                            | 3.85 | 0.0039  |          | 22.86  |
|                               | Glucose 14                                            | 3.84 | 0.0039  |          | 36.36  |
|                               | Glucose 15                                            | 3.75 | 0.0039  |          | 38.47  |
|                               | Glucose 16 and Glucose-6-Phosphate 6                  | 3.52 | 0.0039  |          | 89.14  |

|                                                              |      |        |  |         |
|--------------------------------------------------------------|------|--------|--|---------|
| Glucose 17 and Myoinositol 2                                 | 3.53 | 0.0039 |  | 89.57   |
| Glucose-6-phosphate 7                                        | 3.73 | 0.0039 |  | 56.38   |
| Glucose-6-phosphate 8 and Nicotinurate 1                     | 4.00 | 0.0039 |  | 62.74   |
| Glycine and Glycerol 3                                       | 3.57 | 0.0039 |  | 61.33   |
| Inosine 2 and Glucose-6-Phosphate 9                          | 3.87 | 0.0039 |  | 59.35   |
| Carnitine 1                                                  | 2.44 | 0.0041 |  | -54.11  |
| Methylmalonate 1                                             | 1.24 | 0.0042 |  | -43.16  |
| Carnitine 2                                                  | 2.43 | 0.0044 |  | -62.29  |
| Acetylphosphate and S-Adenosylhomocysteine 1 and Glutamine 1 | 2.12 | 0.0046 |  | -31.69  |
| Carnitine 3                                                  | 2.47 | 0.0046 |  | -55.08  |
| Carnitine 4                                                  | 2.46 | 0.0047 |  | -57.82  |
| Methylmalonate 2                                             | 1.25 | 0.0047 |  | -41.57  |
| ATP 1, ADP 1, AMP 1, IMP 1                                   | 6.13 | 0.0048 |  | -80.51  |
| Glutamine 2                                                  | 2.16 | 0.0048 |  | -68.52  |
| Niacinamide 1                                                | 8.95 | 0.0054 |  | -59.53  |
| Glutamine 3                                                  | 2.16 | 0.0056 |  | -65.38  |
| Argininosuccinic Acid 1 and Glycylproline 1 and Ornithine 1  | 1.94 | 0.006  |  | -95.85  |
| Glucose 18                                                   | 3.25 | 0.0062 |  | 17.83   |
| Lactate                                                      | 4.15 | 0.0062 |  | 11.92   |
| Anserine 3 and Carnosine 1                                   | 2.66 | 0.0068 |  | -8.73   |
| Acetylcholine                                                | 2.15 | 0.0072 |  | -32.75  |
| Niacinamide 2                                                | 8.72 | 0.0072 |  | -82.11  |
| Tryptophan 1                                                 | 7.73 | 0.0072 |  | -103.36 |
| Niacinamide 3                                                | 7.61 | 0.0074 |  | -93.38  |
| Uridine 1                                                    | 5.91 | 0.0074 |  | -118.62 |
| GTP or GDP 1 and Uridine 2                                   | 5.92 | 0.0075 |  | -118.27 |
| Proline 3 and Malic acid                                     | 2.36 | 0.0075 |  | -44.50  |
| Niacinamide 4                                                | 7.61 | 0.0076 |  | -94.71  |
| Niacinamide 5                                                | 7.60 | 0.0076 |  | -93.65  |
| UNIDENTIFIED 3                                               | 6.02 | 0.0077 |  | -96.88  |
| Adenine 1                                                    | 8.22 | 0.0078 |  | -87.13  |
| AMP 2 and ATP 2                                              | 8.24 | 0.0078 |  | -80.34  |
| GTP or GDP 2 and Uridine 3                                   | 5.93 | 0.0078 |  | -116.02 |
| Histamine 3                                                  | 7.09 | 0.0078 |  | -88.48  |
| Niacinamide 6                                                | 8.73 | 0.0078 |  | -74.97  |
| S-Adenosylhomocysteine 2                                     | 4.46 | 0.0078 |  | -47.05  |
| Tryptophan 2                                                 | 7.56 | 0.0078 |  | -109.84 |
| Tyrosine 1                                                   | 7.21 | 0.0078 |  | -76.81  |
| UNIDENTIFIED 4                                               | 2.99 | 0.0078 |  | -82.69  |
| UNIDENTIFIED 5                                               | 8.27 | 0.0081 |  | -43.24  |
| Niacinamide 7                                                | 7.62 | 0.0084 |  | -90.78  |

|                                                                     |      |        |  |         |
|---------------------------------------------------------------------|------|--------|--|---------|
| Tryptophan 3                                                        | 7.74 | 0.0088 |  | -105.59 |
| 4-Pyridoxic Acid                                                    | 7.55 | 0.0091 |  | -109.17 |
| Hypoxanthine                                                        | 8.17 | 0.0091 |  | -66.64  |
| Phenylalanine 1                                                     | 7.45 | 0.0091 |  | -97.35  |
| Aspartic Acid 1                                                     | 2.82 | 0.0095 |  | -84.27  |
| 1,5-Anhydrosorbitol 3                                               | 3.99 | 0.01   |  | 35.49   |
| UNIDENTIFIED 6                                                      | 7.88 | 0.0101 |  | -112.06 |
| AMP 3                                                               | 8.60 | 0.0102 |  | -94.48  |
| Betaine 2                                                           | 3.90 | 0.0102 |  | 24.28   |
| S-Adenosylhomocysteine 3 and Proline 4                              | 2.07 | 0.0102 |  | -40.28  |
| N-Acetylmannosamine 1 and<br>S-Adenosylhomocysteine 4 and Proline 5 | 2.06 | 0.0103 |  | -48.99  |
| Nicotinurate 2                                                      | 4.00 | 0.0103 |  | 35.59   |
| S-Adenosylhomocysteine 5 and Proline 6                              | 2.09 | 0.0105 |  | -74.65  |
| Tryptophan 4                                                        | 7.57 | 0.0105 |  | -114.96 |
| UNIDENTIFIED 7                                                      | 7.49 | 0.0105 |  | -108.97 |
| UNIDENTIFIED 8                                                      | 7.49 | 0.0105 |  | -109.20 |
| S-Adenosylhomocysteine 6                                            | 6.10 | 0.0106 |  | -39.68  |
| UNIDENTIFIED 9                                                      | 8.26 | 0.0107 |  | -46.65  |
| UNIDENTIFIED 10                                                     | 6.34 | 0.0107 |  | -115.62 |
| UNIDENTIFIED 11                                                     | 8.02 | 0.0112 |  | -110.98 |
| Carnosine 2                                                         | 8.18 | 0.0113 |  | -71.52  |
| 1-Methyladenine                                                     | 8.28 | 0.0117 |  | -46.50  |
| Argininosuccinic Acid 2 and Glycylproline 2<br>and Ornithine 2      | 1.95 | 0.0117 |  | -86.80  |
| Argininosuccinic Acid 3 and Glycylproline 3<br>and Ornithine 3      | 1.94 | 0.0117 |  | -89.24  |
| Argininosuccinic Acid 4 and Glycylproline 4<br>and Ornithine 4      | 1.92 | 0.0117 |  | -72.04  |
| Carnitine 5                                                         | 2.48 | 0.0117 |  | -62.88  |
| Dimethylglycine                                                     | 2.94 | 0.0117 |  | -49.62  |
| Glutamine 4 and S-Adenosylhomocysteine 7                            | 2.14 | 0.0117 |  | -63.42  |
| Glutamine 5 and S-Adenosylhomocysteine 8                            | 2.13 | 0.0117 |  | -63.40  |
| Glutathione 2                                                       | 3.00 | 0.0117 |  | -77.46  |
| Glutathione 3                                                       | 2.99 | 0.0117 |  | -84.29  |
| Glutathione 4                                                       | 2.98 | 0.0117 |  | -75.23  |
| Glutathione 5                                                       | 2.95 | 0.0117 |  | -76.94  |
| Guanidinoacetate                                                    | 3.80 | 0.0117 |  | 20.29   |
| IMP 2                                                               | 8.23 | 0.0117 |  | -87.69  |
| Malonate                                                            | 3.14 | 0.0117 |  | -33.54  |
| Ornithine 5                                                         | 1.91 | 0.0117 |  | -70.12  |
| Phenylalanine 1                                                     | 3.16 | 0.0117 |  | -46.52  |
| 1-Methylhistidine 1                                                 | 7.01 | 0.0117 |  | -108.70 |

|                               |      |        |  |         |
|-------------------------------|------|--------|--|---------|
| S-Adenosylhomocysteine 9      | 2.17 | 0.0117 |  | -56.16  |
| Tyrosine 2                    | 7.19 | 0.0117 |  | -73.90  |
| Tyrosine 3                    | 6.92 | 0.0117 |  | -84.36  |
| Tyrosine 4                    | 6.91 | 0.0117 |  | -87.34  |
| UMP 1                         | 6.01 | 0.0117 |  | -111.73 |
| UMP 2                         | 5.99 | 0.0117 |  | -97.27  |
| UMP 3                         | 5.98 | 0.0117 |  | -104.68 |
| τ-Methylhistidine 1           | 3.17 | 0.0117 |  | -51.86  |
| Glucose-6-phosphate 10        | 4.03 | 0.0118 |  | 14.69   |
| UNIDENTIFIED 12               | 2.21 | 0.0119 |  | -75.81  |
| UNIDENTIFIED 13               | 6.03 | 0.0119 |  | -89.81  |
| Proline 7 and Glycylproline 1 | 2.04 | 0.0121 |  | -57.53  |
| UNIDENTIFIED 14               | 7.89 | 0.0122 |  | -113.08 |
| S-Adenosylhomocysteine 10     | 4.45 | 0.0124 |  | -32.49  |
| UNIDENTIFIED 15               | 7.37 | 0.0124 |  | -104.61 |
| 1-Methylhistidine 2           | 7.70 | 0.0125 |  | -110.84 |
| Aspartic Acid 2               | 2.82 | 0.0125 |  | -78.08  |
| Aspartic Acid 3               | 2.80 | 0.0125 |  | -66.09  |
| UNIDENTIFIED 16               | 6.10 | 0.0125 |  | -81.15  |
| UNIDENTIFIED 17               | 7.27 | 0.0126 |  | -77.51  |
| S-Adenosylhomocysteine 11     | 6.11 | 0.0131 |  | -45.45  |
| Valine 1                      | 2.26 | 0.0135 |  | -90.65  |
| Phenylalanine 2               | 7.33 | 0.0137 |  | -77.21  |
| Riboflavin 1                  | 7.38 | 0.0138 |  | -92.38  |
| Valine 2                      | 2.27 | 0.0138 |  | -85.03  |
| UNIDENTIFIED 18               | 4.67 | 0.0139 |  | 29.68   |
| Beta-Alanine 1                | 3.17 | 0.0141 |  | -54.48  |
| UNIDENTIFIED 19               | 8.83 | 0.0145 |  | -78.94  |
| UNIDENTIFIED 20               | 2.25 | 0.0145 |  | -72.22  |
| Phenylalanine 3               | 7.35 | 0.0146 |  | -70.65  |
| Aspartic Acid 4               | 2.79 | 0.0147 |  | -62.02  |
| Carnosine 3                   | 7.15 | 0.015  |  | -39.52  |
| Valine 3                      | 2.27 | 0.015  |  | -86.26  |
| Valine 1                      | 2.26 | 0.0151 |  | -87.22  |
| UNIDENTIFIED 21               | 8.82 | 0.0152 |  | -80.15  |
| UNIDENTIFIED 22               | 2.20 | 0.0153 |  | -69.84  |
| Valine 4                      | 2.28 | 0.0153 |  | -88.46  |
| Riboflavin 2                  | 7.39 | 0.0154 |  | -95.96  |
| Valine 5                      | 2.28 | 0.0154 |  | -84.55  |
| O-Phosphocholine              | 3.24 | 0.0156 |  | -14.97  |
| 1-Methyladenosine 1           | 8.42 | 0.0158 |  | -57.07  |
| Imidazole 1                   | 7.23 | 0.0162 |  | -100.91 |
| UNIDENTIFIED 23               | 3.86 | 0.0175 |  | 25.13   |



|                                                                |      |        |  |         |
|----------------------------------------------------------------|------|--------|--|---------|
| Valine 2                                                       | 2.29 | 0.0176 |  | -71.13  |
| Glycylproline 2 and Proline 8                                  | 1.97 | 0.0184 |  | -55.63  |
| Glycylproline 3 and Proline 9                                  | 2.01 | 0.0189 |  | -56.17  |
| Glycylproline 4 and Proline 10                                 | 2.03 | 0.0191 |  | -49.00  |
| Glycylproline 5 and Proline 11                                 | 2.02 | 0.0192 |  | -46.46  |
| Mannose-6-Phosphate                                            | 5.21 | 0.0194 |  | 82.74   |
| 1-Methyladenosine 2                                            | 8.15 | 0.0195 |  | -74.27  |
| Adenine 2                                                      | 8.19 | 0.0195 |  | -93.21  |
| ADP 2                                                          | 8.53 | 0.0195 |  | -99.53  |
| Alpha-ketoisovaleric acid 1                                    | 1.15 | 0.0195 |  | -87.04  |
| Alpha-ketoisovaleric acid 2                                    | 1.14 | 0.0195 |  | -86.74  |
| Argininosuccinic Acid 5                                        | 1.89 | 0.0195 |  | -67.89  |
| Argininosuccinic Acid 6 and<br>Glycylproline 6                 | 1.95 | 0.0195 |  | -74.71  |
| Argininosuccinic Acid 7 and<br>Glycylproline 7 and Ornithine 6 | 1.93 | 0.0195 |  | -83.89  |
| Argininosuccinic Acid 8 and Ornithine 7                        | 1.90 | 0.0195 |  | -75.22  |
| ATP 3                                                          | 8.53 | 0.0195 |  | -84.34  |
| Carnitine 6                                                    | 2.42 | 0.0195 |  | -62.19  |
| Ethanol 1                                                      | 1.19 | 0.0195 |  | -96.84  |
| Ethanol 2                                                      | 1.18 | 0.0195 |  | -96.35  |
| Ethylmalonic acid                                              | 0.92 | 0.0195 |  | -88.73  |
| Fumaric Acid                                                   | 6.53 | 0.0195 |  | -105.01 |
| Glutamine 6                                                    | 2.15 | 0.0195 |  | -72.33  |
| Glutathione 6                                                  | 2.96 | 0.0195 |  | -81.40  |
| Glutathione 7                                                  | 2.94 | 0.0195 |  | -87.36  |
| Glycylproline 8 and Proline 12                                 | 1.96 | 0.0195 |  | -65.06  |
| GMP 1                                                          | 5.95 | 0.0195 |  | -109.02 |
| GMP 2                                                          | 5.94 | 0.0195 |  | -112.16 |
| Imidazole 2                                                    | 7.29 | 0.0195 |  | -89.19  |
| Isoleucine                                                     | 0.93 | 0.0195 |  | -46.58  |
| Pantothenic Acid                                               | 0.89 | 0.0195 |  | -83.48  |
| Phenylalanine 4                                                | 7.44 | 0.0195 |  | -71.40  |
| Phenylalanine 5                                                | 7.42 | 0.0195 |  | -79.43  |
| Proline 13                                                     | 3.36 | 0.0195 |  | -59.94  |
| Proline 14                                                     | 2.33 | 0.0195 |  | -58.53  |
| S-Adenosylhomocysteine 12 and<br>Proline 15                    | 2.10 | 0.0195 |  | -74.59  |
| Trimethylamine                                                 | 2.90 | 0.0195 |  | -102.38 |
| UMP 4                                                          | 8.11 | 0.0195 |  | -97.56  |
| UMP 5                                                          | 8.10 | 0.0195 |  | -101.07 |
| UNIDENTIFIED 1                                                 | 1.90 | 0.0195 |  | -84.43  |
| UNIDENTIFIED 24                                                | 7.50 | 0.0195 |  | -108.72 |

|                                                                             |      |        |  |         |
|-----------------------------------------------------------------------------|------|--------|--|---------|
| UNIDENTIFIED 25                                                             | 5.63 | 0.0195 |  | -133.76 |
| UNIDENTIFIED 26                                                             | 5.62 | 0.0195 |  | -128.54 |
| UNIDENTIFIED 27                                                             | 2.91 | 0.0195 |  | -86.08  |
| UNIDENTIFIED 28                                                             | 2.89 | 0.0195 |  | -93.94  |
| UNIDENTIFIED 29                                                             | 2.54 | 0.0195 |  | -92.98  |
| UNIDENTIFIED 30                                                             | 8.21 | 0.0195 |  | -101.25 |
| UNIDENTIFIED 31                                                             | 7.48 | 0.0195 |  | -106.98 |
| UNIDENTIFIED 32                                                             | 5.62 | 0.0195 |  | -128.41 |
| UNIDENTIFIED 33                                                             | 5.61 | 0.0195 |  | -131.71 |
| UNIDENTIFIED 34                                                             | 2.91 | 0.0195 |  | -89.52  |
| UNIDENTIFIED 35                                                             | 2.88 | 0.0195 |  | -91.59  |
| UNIDENTIFIED 36                                                             | 2.24 | 0.0195 |  | -67.57  |
| τ-Methylhistidine 2                                                         | 6.99 | 0.0195 |  | -83.84  |
| N-Acetylgalactosamine 2 and<br>S-Adenosylhomocysteine 13 and Proline 16     | 2.05 | 0.02   |  | -27.57  |
| Proline 17 and Malic acid                                                   | 2.37 | 0.0208 |  | -40.15  |
| Glucose 19 and Glucose-6-phosphate 11                                       | 3.50 | 0.0217 |  | 20.82   |
| Glycylproline 9 and Proline 18                                              | 2.00 | 0.0229 |  | -55.26  |
| Anserine 4                                                                  | 2.71 | 0.023  |  | -16.05  |
| Inosine 3                                                                   | 4.28 | 0.0257 |  | -49.17  |
| UNIDENTIFIED 37                                                             | 9.34 | 0.0258 |  | -62.58  |
| Inosine 4                                                                   | 4.44 | 0.0264 |  | -39.88  |
| Inosine 5                                                                   | 4.29 | 0.0264 |  | -36.25  |
| Beta-Alanine 2 and N-Nitrosodimethylamine<br>and Anserine 5 and Carnosine 4 | 3.19 | 0.0266 |  | -9.64   |
| S-Adenosylhomocysteine 14 and<br>Proline 19                                 | 2.08 | 0.0267 |  | -37.03  |
| 1-Methyladenosine 3                                                         | 8.46 | 0.0273 |  | -62.84  |
| 3-Hydroxyisobutyrate                                                        | 1.08 | 0.0273 |  | -85.52  |
| Adenosine Phosphosulfate                                                    | 8.51 | 0.0273 |  | -75.78  |
| Alanine 1                                                                   | 3.77 | 0.0273 |  | -16.96  |
| Methionine                                                                  | 2.19 | 0.0273 |  | -45.02  |
| Phenylalanine 2                                                             | 3.15 | 0.0273 |  | -45.74  |
| UNIDENTIFIED 38                                                             | 7.17 | 0.0273 |  | -50.92  |
| Glycylproline 10 and Proline 20                                             | 1.98 | 0.0285 |  | -46.57  |
| Purine                                                                      | 9.11 | 0.0311 |  | -57.96  |
| Glycylproline 11 and Proline 21                                             | 1.99 | 0.0316 |  | -46.28  |
| S-Adenosylhomocysteine 15                                                   | 8.37 | 0.0324 |  | -24.85  |
| UNIDENTIFIED 39                                                             | 4.27 | 0.0335 |  | -48.15  |
| sn-Glycero-3-phosphocholine 1                                               | 3.64 | 0.0365 |  | -52.67  |
| UNIDENTIFIED 40                                                             | 1.52 | 0.0373 |  | -59.10  |
| Inosine 6                                                                   | 4.28 | 0.039  |  | -32.39  |
| 3-Hydroxybutyric acid 1                                                     | 1.21 | 0.0391 |  | -84.07  |

|                                       |      |        |  |        |
|---------------------------------------|------|--------|--|--------|
| 3-Hydroxybutyric acid 2 and Ethanol 3 | 1.20 | 0.0391 |  | -78.79 |
| Lactic acid 1                         | 1.43 | 0.0391 |  | -28.25 |
| Lactic acid 2                         | 1.42 | 0.0391 |  | -30.27 |
| UNIDENTIFIED 41                       | 3.96 | 0.0391 |  | 44.06  |
| UNIDENTIFIED 42                       | 2.23 | 0.0391 |  | -77.23 |
| UNIDENTIFIED 43                       | 2.81 | 0.0391 |  | -65.80 |
| Inosine 7                             | 4.30 | 0.0395 |  | -40.02 |
| Beta-Alanine 3                        | 2.56 | 0.0397 |  | -61.35 |
| Threonine                             | 3.60 | 0.04   |  | 28.46  |
| sn-Glycero-3-phosphocholine 2         | 3.68 | 0.0426 |  | -60.89 |
| Beta-Alanine 4                        | 2.58 | 0.0448 |  | -65.34 |
| Alanine 2                             | 1.48 | 0.0455 |  | -18.07 |
| Carnosine 5 and Beta-Alanine 5        | 3.18 | 0.0481 |  | -14.24 |
| Glucose 1-Phosphate 1                 | 5.47 | 0.1641 |  | -94.16 |
| Glucose 1-Phosphate 2                 | 5.46 | 0.1641 |  | -89.79 |
| UNIDENTIFIED 44                       | 8.57 | 0.8203 |  | 6.69   |
